# Supplementary material
Source: HighWire-hosted journal article supplement (https://bmjopen.bmj.com/content/8/6/e021114)
Supplement: inline-supplementary-material-1 [file inline-supplementary-material-1.pdf]

# Appendix A

**Table 1:** Characteristics of the study population.

|                                                 | Population without prior<br>mental diagnosis<br>n (%) | Population with SMD<br>n (%) |
|-------------------------------------------------|-------------------------------------------------------|------------------------------|
| All                                             | 29,783 (80.6%)                                        | 7,162 (19.4%)                |
| Previously attempted smoking cessation          |                                                       |                              |
| Yes                                             | 17,966 (60.3%)                                        | 2,985 (55.9%)                |
| No                                              | 11,227 (37.7%)                                        | 2,985 (41.7%)                |
| Heavy smoker <sup>b</sup>                       |                                                       |                              |
| Yes                                             | 22,044 (74.0%)                                        | 5,770 (80.6%)                |
| No                                              | 7,032 (23.6%)                                         | 878 (17.4%)                  |
| Unknown                                         | 707 (2.4%)                                            | 149 (2.1%)                   |
| Smoking                                         |                                                       |                              |
| <20 pack years                                  | 9,355 (31.4%)                                         | 2,106 (29.4%)                |
| ≥20 pack years                                  | 19,461 (65.3%)                                        | 4,798 (67.0%)                |
| Fagerström score <sup>a</sup> 0-6               | 23,100 (77.6%)                                        | 4,191 (58.5%)                |
| Fagerström score 7-10                           | 6,683 (22.4%)                                         | 2,971 (41.5%)                |
| <20 cigarettes per day                          | 13,842 (46.5%)                                        | 2,430 (33.9%)                |
| ≥20 cigarettes per day                          | 15,941 (53.5%)                                        | 4,732 (66.1%)                |
| Age (years)                                     |                                                       |                              |
| 18-24                                           | 1,304 (4.4%)                                          | 389 (5.4%)                   |
| 25-34                                           | 3,423 (11.5%)                                         | 1,064 (14.9%)                |
| 35-44                                           | 5,661 (19.0%)                                         | 1,388 (19.4%)                |
| 45-54                                           | 7,579 (25.5%)                                         | 1,877 (26.2%)                |
| 55-64                                           | 7,098 (23.8%)                                         | 1,668 (23.3%)                |
| 65+                                             | 4,718 (15.8%)                                         | 776 (10.8%)                  |
| Sex                                             |                                                       |                              |
| Men                                             | 12,278 (41.2%)                                        | 2,937 (41.0%)                |
| Women                                           | 17,505 (58.8%)                                        | 4,225 (59.0%)                |
| Living with smoker                              |                                                       |                              |
| Yes                                             | 10,129 (34.0%)                                        | 1,917 (26.8%)                |
| No                                              | 19,389 (65.0%)                                        | 5,168 (72.2%)                |
| Unknown                                         | 265 (0.9%)                                            | 77 (1.1%)                    |
| Medication <sup>c</sup> offered for free        |                                                       |                              |
| Yes                                             | 13,526 (45.4%)                                        | 3,632 (50.7%)                |
| No                                              | 12,880 (43.3%)                                        | 3,115 (43.5%)                |
| Unknown                                         | 3,377 (11.3%)                                         | 415 (5.8%)                   |
| Compliant with programme <sup>d</sup>           |                                                       |                              |
| Yes                                             | 18,712 (62.8%)                                        | 3,684 (51.4%)                |
| No                                              | 10,661 (35.8%)                                        | 3,393 (47.4%)                |
| Unknown                                         | 410 (1.4%)                                            | 85 (1.2%)                    |
| Recommendation by healthcare staff <sup>e</sup> |                                                       |                              |
| Yes                                             | 17,078 (57.3%)                                        | 4,690 (65.5%)                |
| No                                              | 11,322 (38.0%)                                        | 2,162 (30.2%)                |
| Unknown                                         | 1,383 (4.6%)                                          | 310 (4.3%)                   |
| Disadvantaged <sup>g</sup>                      |                                                       |                              |
| Yes                                             | 10,178 (34.2%)                                        | 4,128 (57.6%)                |
| No                                              | 18,451 (62.0%)                                        | 2,746 (38.3%)                |
| Unknown                                         | 1,154 (3.9%)                                          | 288 (4.0%)                   |
| Education level <sup>†</sup>                    |                                                       |                              |
| Low                                             | 7,979 (26.8%)                                         | 2,448 (34.2%)                |
| Medium                                          | 6,257 (21.0%)                                         | 1,430 (20.0%)                |
| High                                            | 14,532 (48.8%)                                        | 2,971 (41.5%)                |
| Unknown                                         | 1,015 (3.4%)                                          | 313 (4.4%)                   |
| Employment                                      |                                                       |                              |
| Employed                                        | 18,079 (60.7%)                                        | 2,480 (34.7%)                |

|                         |                |               |
|-------------------------|----------------|---------------|
| Unemployed              | 3,964 (13.3%)  | 3,055 (42.7%) |
| Student                 | 1,174 (3.9%)   | 428 (6.0%)    |
| Retired                 | 5,747 (19.3%)  | 967 (13.5%)   |
| Unknown                 | 819 (2.68%)    | 230 (3.2%)    |
| <b>Setting</b>          |                |               |
| Municipality            | 22,653 (76.0%) | 5,636 (78.7%) |
| Pharmacy                | 4,522 (15.2%)  | 938 (13.1%)   |
| Hospital                | 1,943 (6.5%)   | 514 (7.2%)    |
| Other                   | 665 (2.2%)     | 74 (1.0%)     |
| <b>Programme format</b> |                |               |
| Individual              | 4,858 (16.3%)  | 1,813 (25.3%) |
| Group                   | 24,925 (83.7%) | 5,347 (74.7%) |
| Unknown                 | 0 (0.0%)       | 2 (0.0%)      |
| <b>GSP year</b>         |                |               |
| 2006                    | 3,628 (12.1%)  | 460 (6.4%)    |
| 2007                    | 4,210 (14.1%)  | 538 (7.5%)    |
| 2008                    | 3,332 (11.2%)  | 570 (8.0%)    |
| 2009                    | 3,203 (10.8%)  | 669 (9.3%)    |
| 2010                    | 3,063 (10.3%)  | 698 (9.8%)    |
| 2011                    | 2,123 (7.1%)   | 526 (7.3%)    |
| 2012                    | 1,882 (6.3%)   | 505 (7.0%)    |
| 2013                    | 1,256 (4.2%)   | 422 (5.9%)    |
| 2014                    | 1,264 (4.2%)   | 450 (6.3%)    |
| 2015                    | 2,489 (8.4%)   | 992 (13.9%)   |
| 2016                    | 3,333 (11.2%)  | 1,332 (18.6%) |

- a) Fagerström score: a standard for quantifying nicotine addiction.
- b) Heavy smoker: defined as having  $\geq 20$  pack years, a Fagerström score of  $\geq 7$  points and/or a daily consumption of  $\geq 20$  cigarettes.
- c) Free medication: Either nicotine replacement therapy, varenicline or bupropion.
- d) Compliance: defined as having participated in at least 75% of the planned meeting sessions.
- e) Healthcare staff: doctors, nurses, nurses' assistants.
- f) Education level: low:  $\leq 12$  years of school, medium:  $> 12$  years of school but  $< 3$  years of higher education, high:  $\geq 3$  years of higher education.
- g) Disadvantaged:  $\leq 12$  years of school and/or unemployed.
